# Supplementary material for: Characteristics of water quality and bacterial communities in three water supply pipelines
Source: Royal Society of Chemistry journal article supplement (doi:10.1039/c8ra08645a), 2019-01-01

## Supplementary Material 1

Fig. S1 Schematic of the pipeline simulation annular reactor

Fig. S2 Variation of water quality in AR systems

Fig. S3 Rarefaction curve

Fig. S4 Top 10 species with the highest abundance of each sample at each classification level

Table S1 Test water quality and standard limits

Table S2 Major water quality monitoring parameters and test methods

Table S3 Community distribution of corrosion microorganisms at genus-level

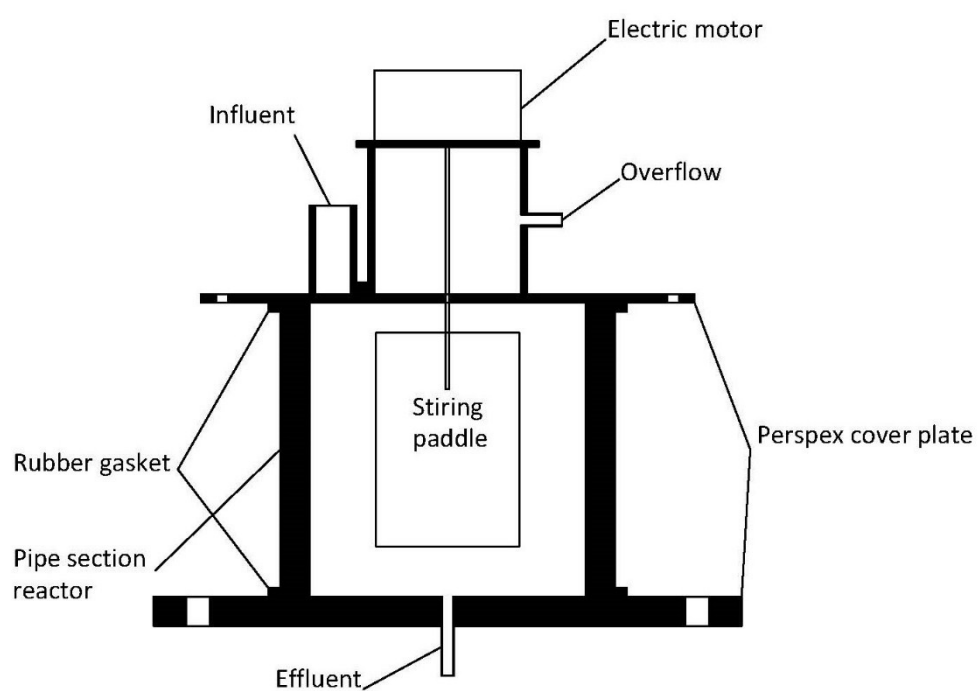

Fig. S1 Schematic of the pipeline simulation annular reactor

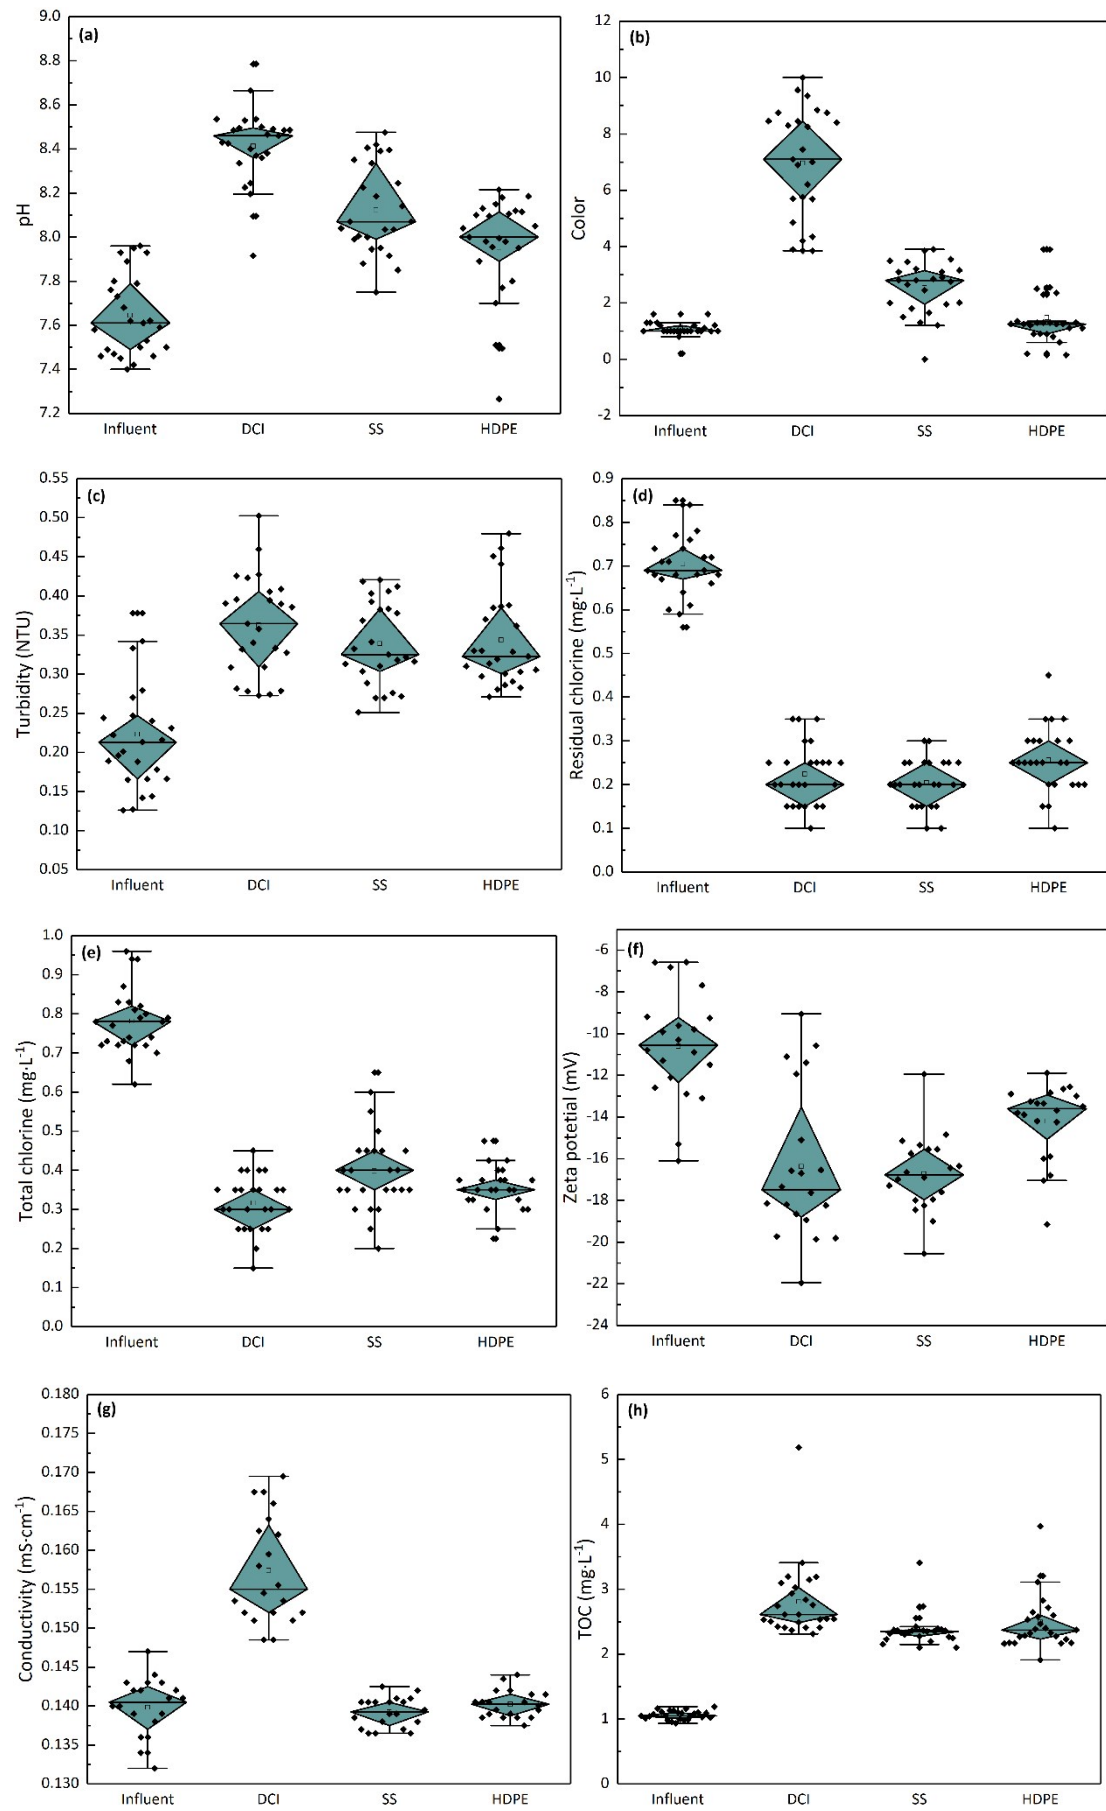

Fig. S2 Variation of water quality in AR systems

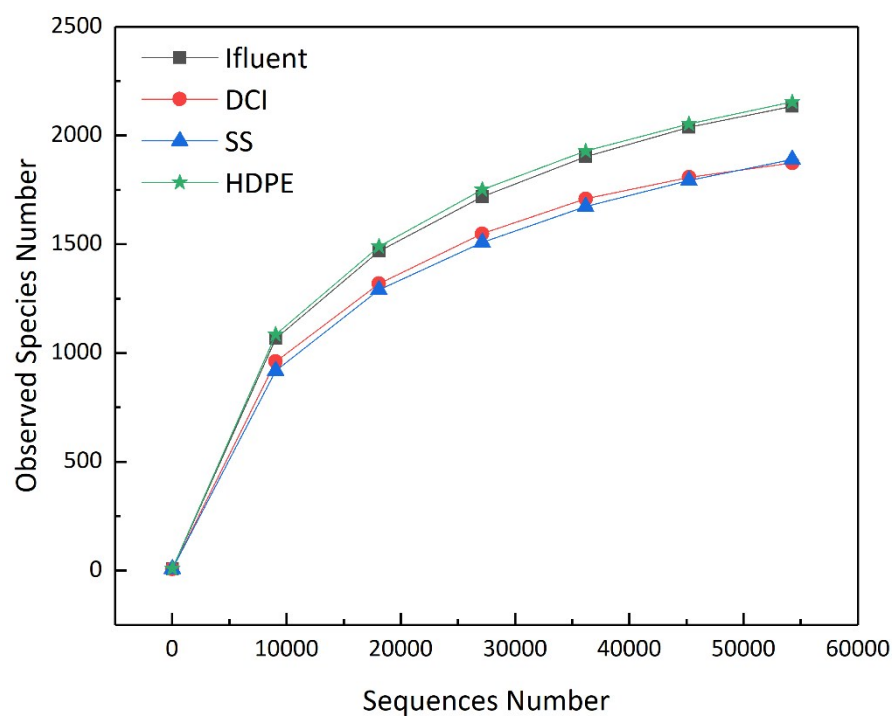

Fig. S3 Rarefaction curve

Note: The abscissa is the number of sequencing samples randomly extracted from a sample, the ordinate is the number of OUTs that can be constructed based on the number of sequencing numbers. It is used to reflect the sequencing depth. Different samples are represented by curves of different colors.

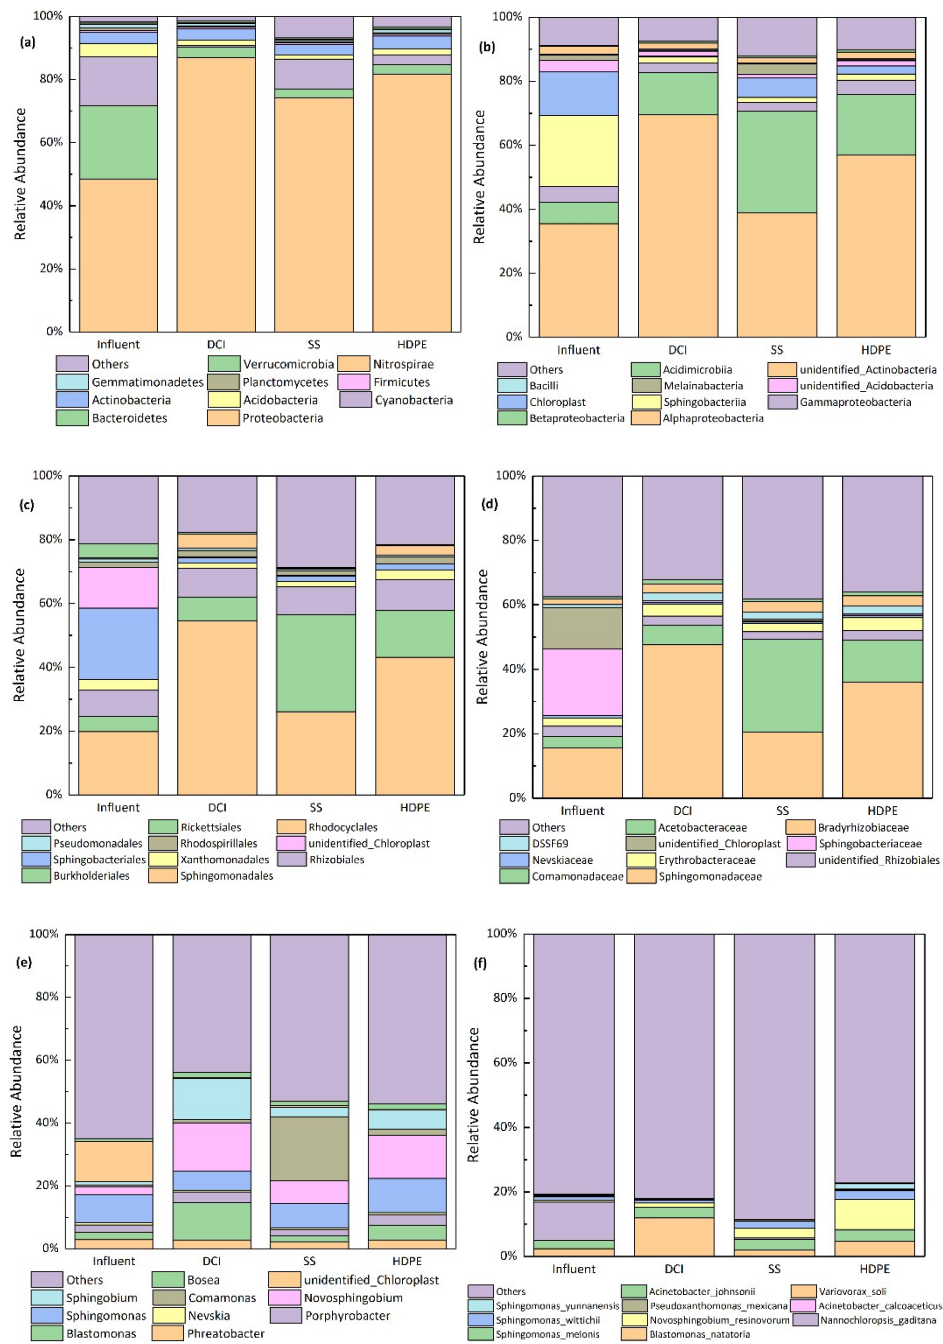

Fig. S4 Top 10 species with the highest abundance of each sample at each classification level  
(From a to f, on behalf of the phylum, class, order, family, genus, and species, respectively)

Table S1 Test water quality and standard limits

|                   | Influent water      | National standard | Shenzhen standard |
|-------------------|---------------------|-------------------|-------------------|
| pH                | 7.4 ~ 7.96          | 6.5 ~ 8.5         | 7.0 ~ 8.5         |
| Color             | 0 ~ 1.6             | 15                | 10                |
| Turbidity         | 0.126 ~ 0.378 NTU   | 1 NTU             | 0.5 NTU           |
| Residual chlorine | 0.56 ~ 0.85 mg/L    | ≥0.3mg/L (TDW)    | ≥0.3 mg/L (TDW)   |
|                   |                     | ≥0.05mg/L (EW)    | ≥0.05mg/L (EW)    |
| Total chlorine    | 0.62 ~ 0.96 mg/L    | ≥0.5 mg/L (TDW)   | -                 |
|                   |                     | ≥0.05mg/L (EW)    | -                 |
| TOC               | 0.932 ~ 1.19 mg/L   | 5 mg/L            | 3 mg/L            |
| Hardness          | 42.3~44.6 mg/L      | 450 mg/L          | 450 mg/L          |
| Alkalinity        | 30.5~34.7 mg/L      | -                 | -                 |
| Sulfate           | 9.86~10.47 mg/L     | 250 mg/L          | 250 mg/L          |
| Chloride          | 10.42~14.57 mg/L    | 250 mg/L          | 250 mg/L          |
| Zeta potential    | -16.1 ~ -6.85 mV    | -                 | -                 |
| Conductivity      | 0.132 ~ 0.147 mS/cm | -                 | -                 |
| Particle size     | 0~200 nm            | -                 | -                 |
| distribution      |                     |                   |                   |

Note: (1) “-” indicates that the water quality indicator is not specified.

(2) “TDW” is “the treated water from the waterworks”.

(3) “EW” is “end water of drinking water distribution systems”.

Table S2 Major water quality monitoring parameters and test methods

|                            | Test Methods                           |
|----------------------------|----------------------------------------|
| pH                         | HACH GQIId pH                          |
| Color                      | XINRUI SD9012AB water color meter      |
| Turbidity                  | HACH 2100AN benchtop turbidity meter   |
| Residual chlorine          | HACH PCII single parameter colorimeter |
| Total chlorine             | HACH PCII single parameter colorimeter |
| TOC                        | GE Sievers TOC                         |
| Zeta potential             | Zetasizer Nano ZEN3600                 |
| Conductivity               | Zetasizer Nano ZEN3600                 |
| Particle size distribution | Zetasizer Nano ZEN3600                 |



Table S3 Community distribution of corrosion microorganisms at genus-level

| Functional bacteria             |     | Functional bacteria community at Genus-Level                                                                         |
|---------------------------------|-----|----------------------------------------------------------------------------------------------------------------------|
| Iron cycling<br>bacteria        | IOB | Acidovorax, Aquabacterium, Bradyrhizobium, Pedomicrobium,<br>Rhodanobacter, Sediminibacterium, Thiobacillus, Gaiella |
|                                 | IRB | Arthrobacter, Bacillus, Geothrix, Pseudomonas, Rhodobacter, Shewanella,<br>Clostridium                               |
| Sulfur cycling<br>bacteria      | SOB | Thiobacillus                                                                                                         |
|                                 | SRB | Desulfobacca                                                                                                         |
| Nitrogen<br>cycling<br>bacteria | NRB | Acinetobacter, Dechloromonas, Rhodocytophaga, Sphingomonas,<br>Hydrogenophaga, Hyphomicrobium                        |
|                                 | NFB | Azospirillum                                                                                                         |
| APB                             |     | Massilia, Nocardioidea, Propionibacterium, Streptococcus                                                             |

# Characteristics of water quality change after transformation of Yantian

## District pipe network

There are 5 sampling locations, which are numbered A, B, C, D, and E. They are all the communities that have just completed the transformation of the pipe network. The pipes of the water supply pipe after replacement are stainless steel pipes, and the sampling points are the water intake of the water meter group.

### 1. pH and ORP variation characteristics

The variations of pH and ORP are consistent with the variation of laboratory simulation experiment, and the change trend of the two parameters is just the opposite. The pH of the five districts gradually decreased in the early stage and stabilized in the later stage, and the B, C, D and E remained at 7.9, but the pH of the A continued to be lower than the other four ones.

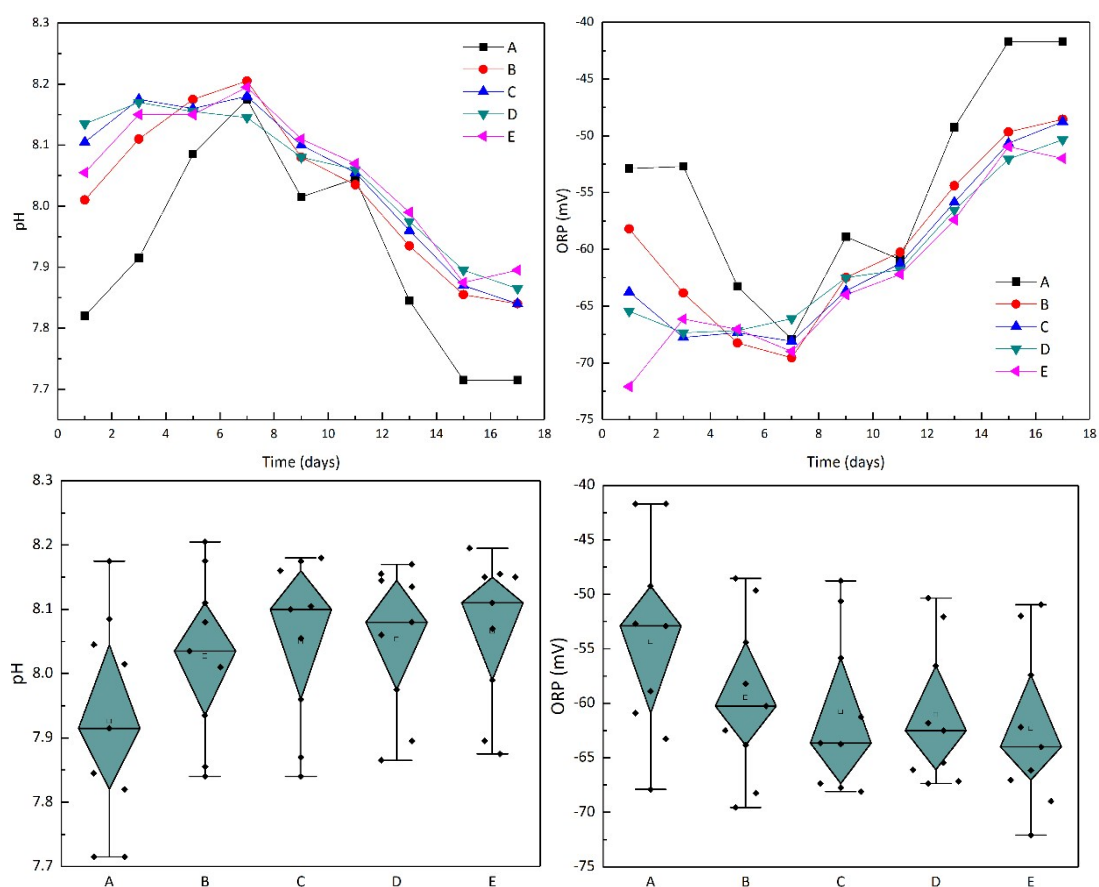

### 2. Color and turbidity

Changes in color and turbidity are in line with laboratory simulations. The tap water changes

of the five districts were consistent, the color first increased and then decreased, reaching the highest value in about 10 days, but the color of A and B were much higher than the other three ones on the 11<sup>th</sup> day. The turbidity values of the five were basically the same, showing a certain fluctuation, but always within 0.42 NTU.

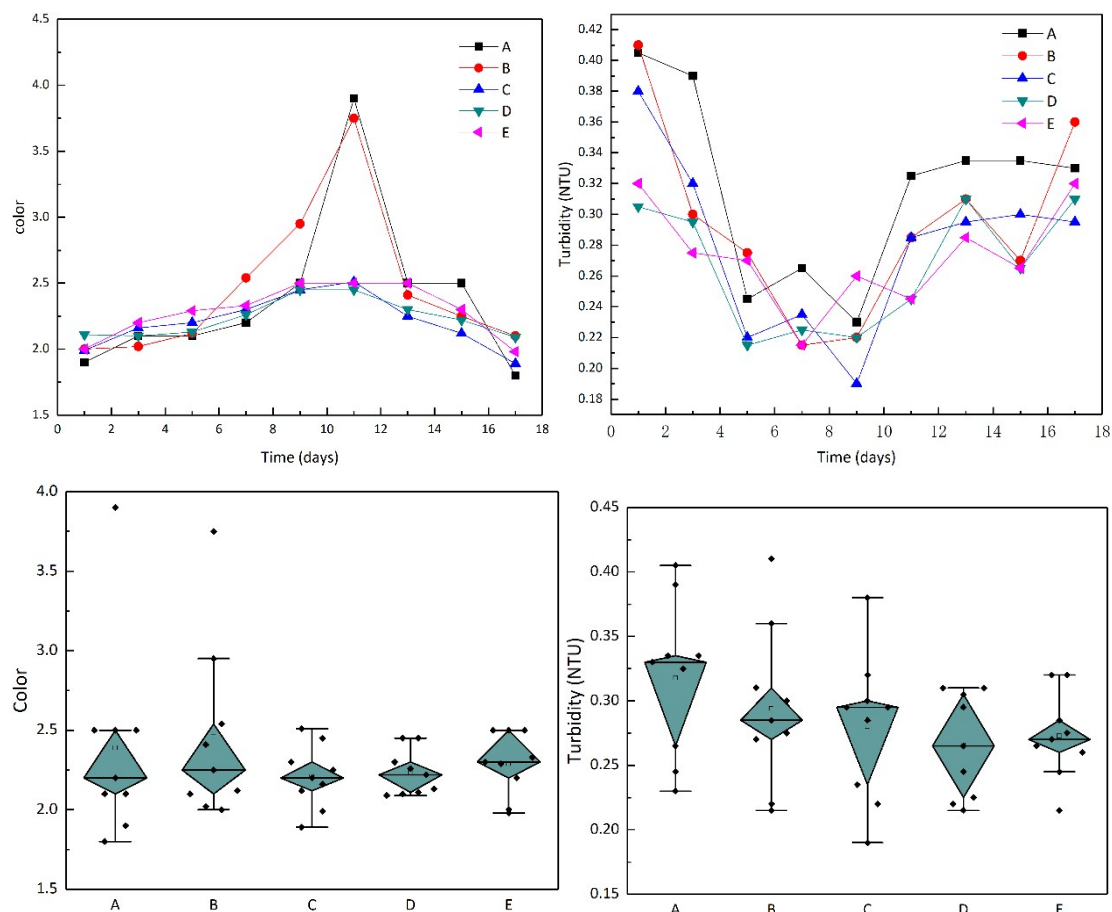

### 3. Residual chlorine and total chlorine

The residual chlorine and total chlorine curves are consistent with the laboratory simulation experiments, but there are some differences in the values. The residual chlorine and total chlorine in the actual water are higher than the laboratory simulation experiments. The reason may be due to the experimental values are measured after a long hydraulic stay, and the water in the actual community passes through the night, and the user's use promotes the flow of water in the morning, supplementing the residual chlorine and total chlorine value of the water.

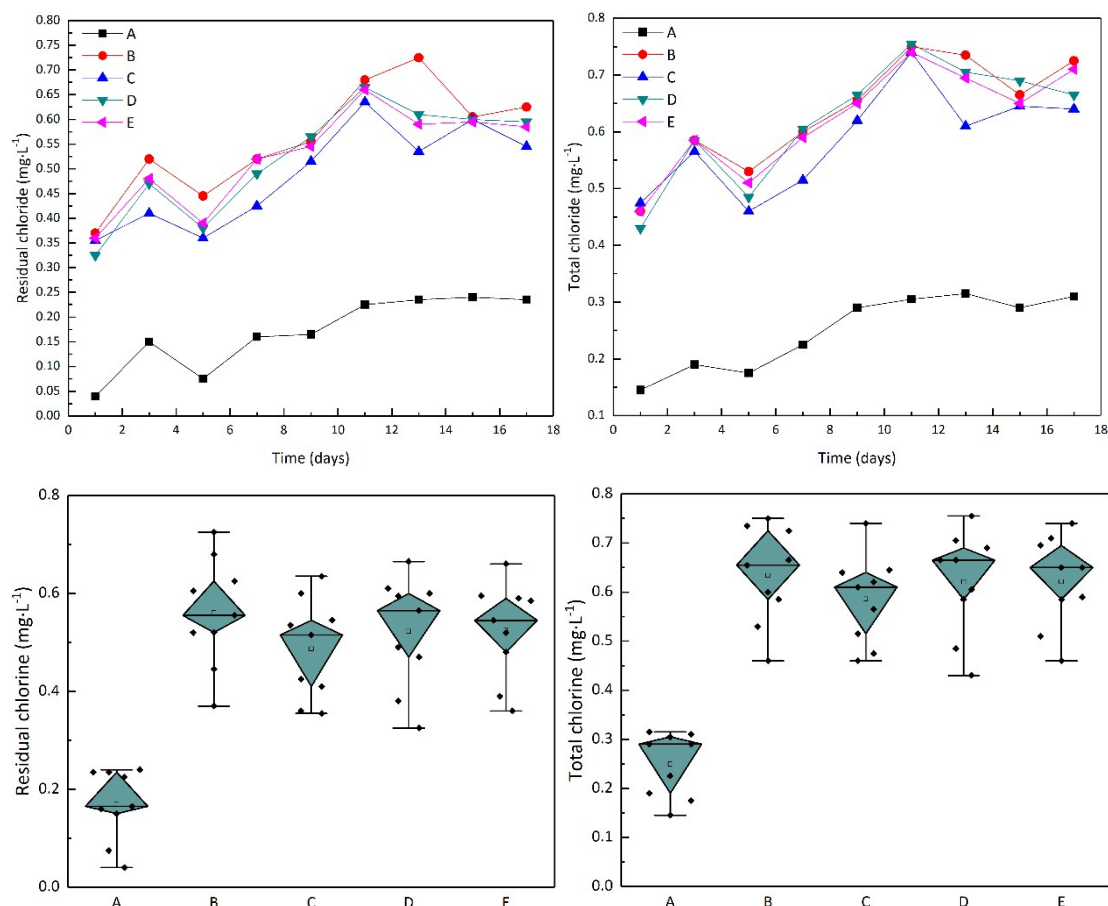

#### 4. Metal ions

The laboratory simulation experiment did not detect the metal ion content. however, the content of  $\text{Fe}^{2+}$  and  $\text{Fe}^{3+}$  in the five districts showed a regulation of increasing first and then decreasing, and reached the maximum value on the 10<sup>th</sup> day, then gradually decreased and stabilized; The variation curve of manganese in the five districts has no good consistency with the change of  $\text{Fe}^{2+}$  and  $\text{Fe}^{3+}$ , but it also shows a gradual increase and then decreases and stabilizes. The manganese content is always maintained at a low level, and is much lower than  $\text{Fe}^{2+}$  and  $\text{Fe}^{3+}$ .

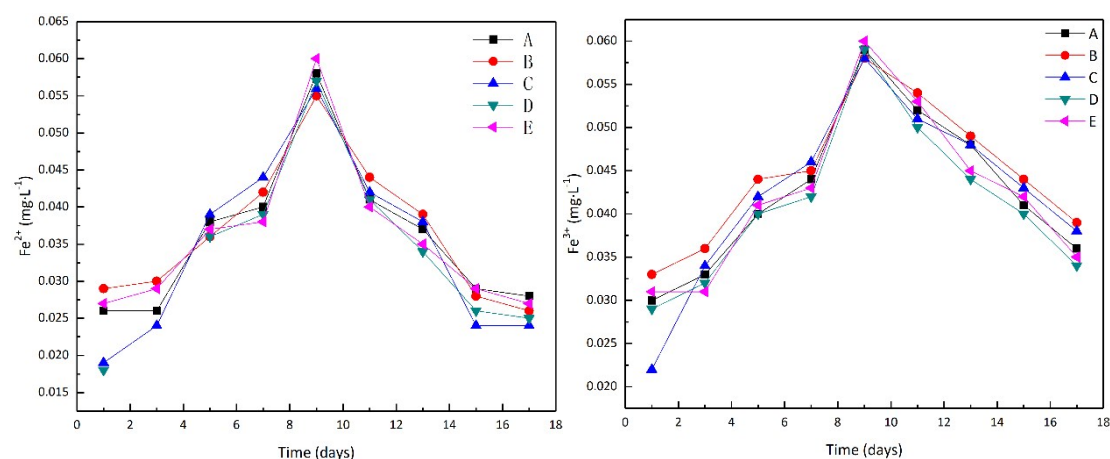

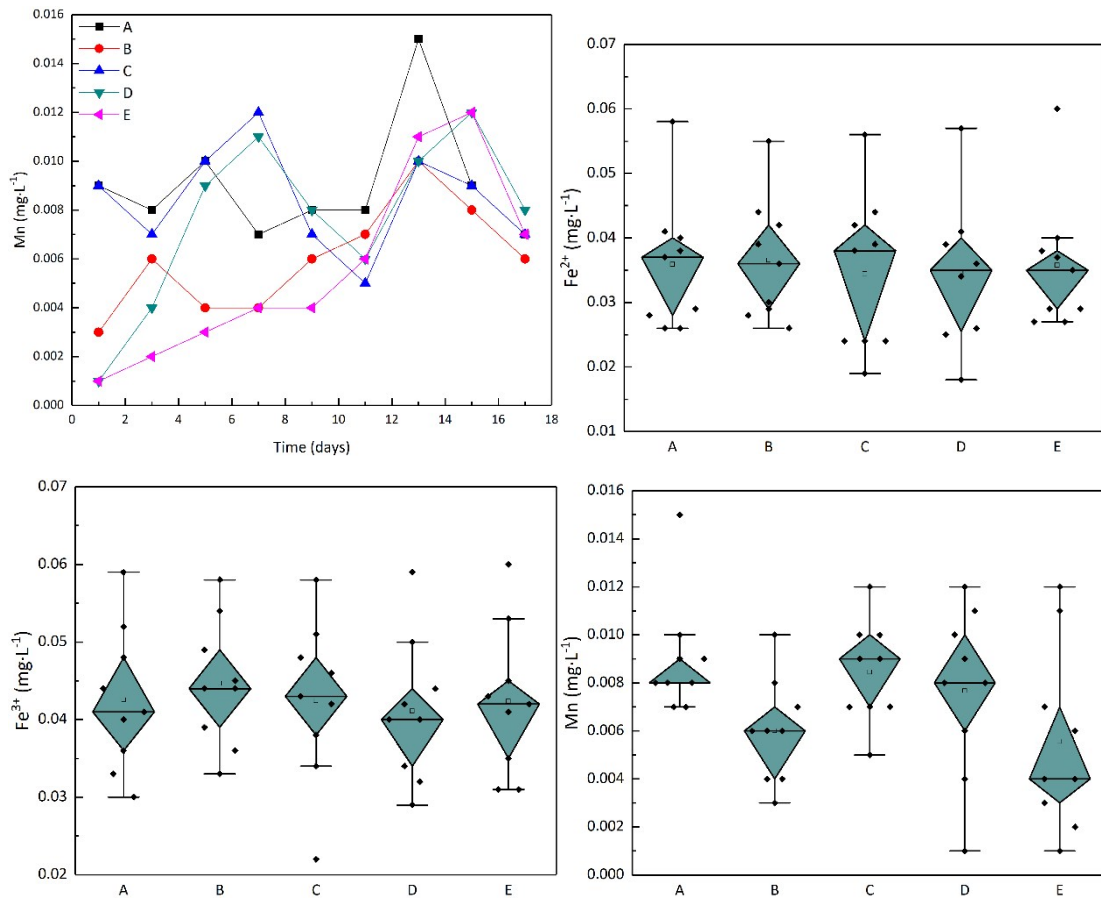

## 5. Zeta potential and conductivity

Zeta potential is the comprehensive effect of all charged substances in the reaction water body, the stability of the water body, and the conductivity content of the water in the reaction body. It is difficult to find the regulation of zeta potential from the line graph, but from the Zeta potential box pattern, it can be clearly seen that the water body stability trend of the five districts water bodies is B>D>E>A>C; the variation of the conductivity curves of the five is basically consistently, after the fifth day of the A, the conductivity of the water body is significantly higher than that of the other four ones. As can be seen from the box plot, the impurity content of the water in the five districts is A>E>B>D>C.

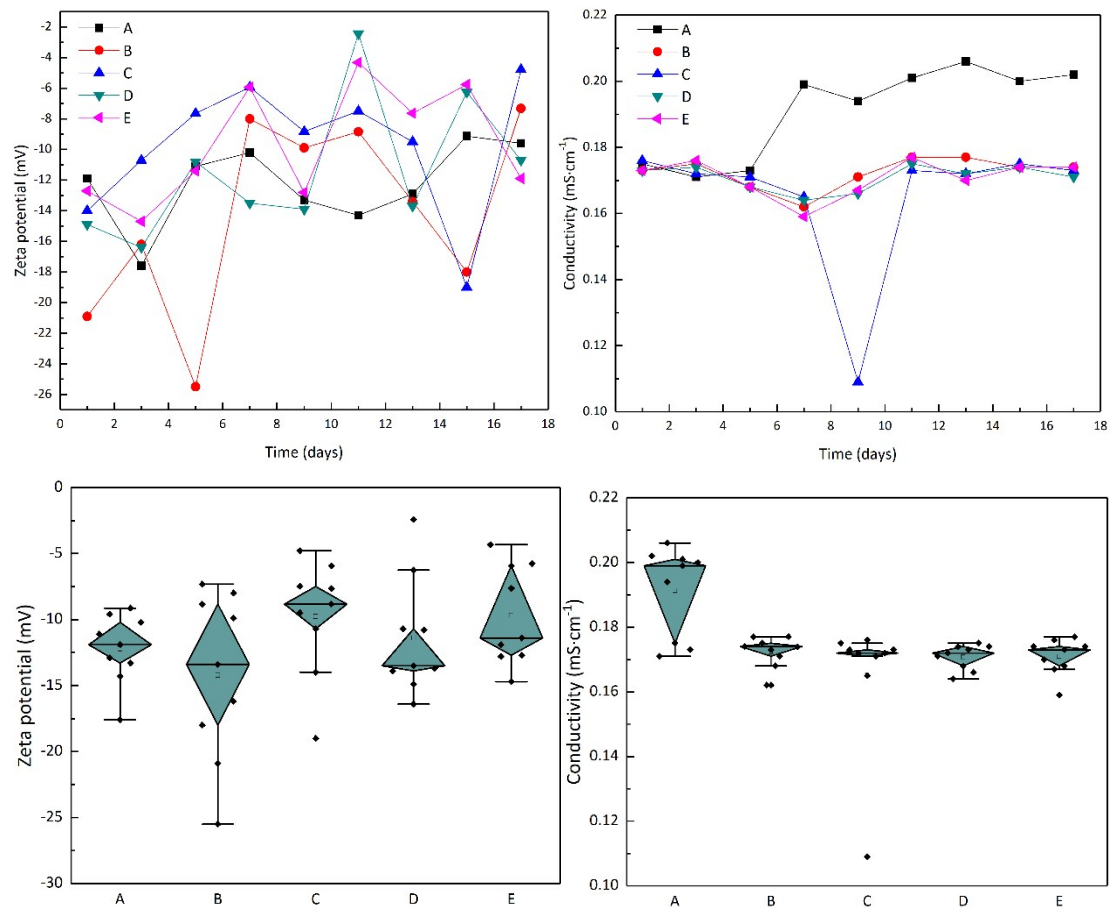

## 6. TOC

The trend of TOC is consistent with the results of laboratory simulations, which are gradually decreasing and tending to be stable. The TOC of the five are significantly lower than that of the laboratory simulation experiment. The main reason may be that the user uses water to cause the water to carry away some of the TOC. The difference in TOC content in the waters of the five can be clearly seen from the box plot: B>E>C>D>A.

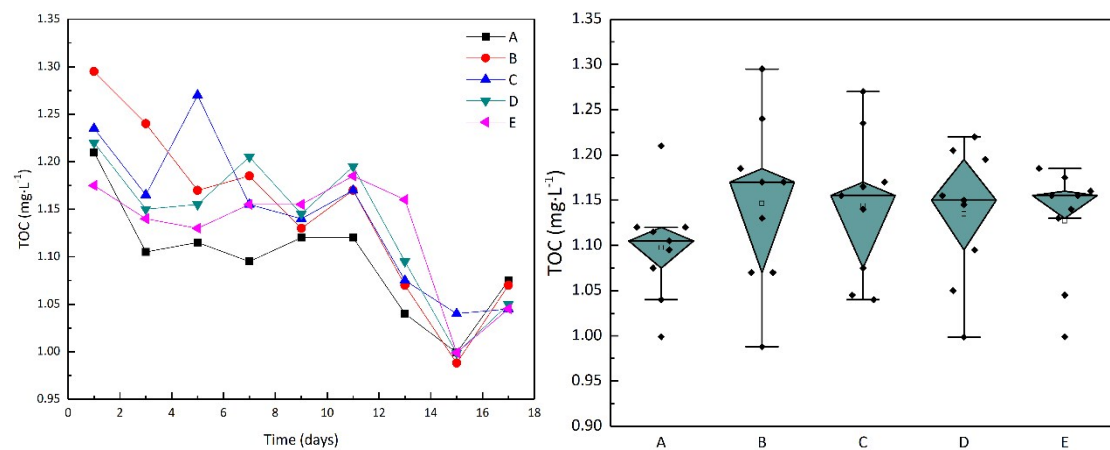

## 7. Particle size distribution

The particle size distribution is consistent with the results of laboratory simulation experiments. The particle size of the water in the stainless steel tube is small, all within 500 nm.

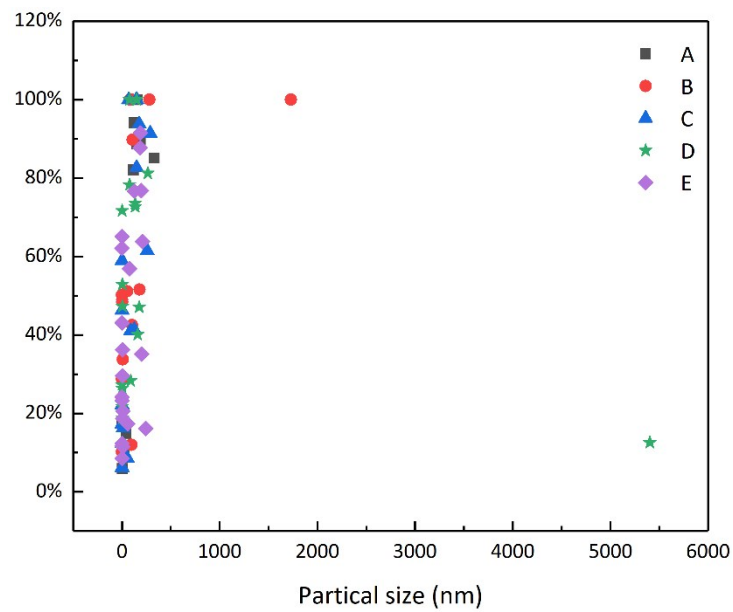

Supplement: c8ra08645a1.pdf [file c8ra08645a1.pdf]
